# Supplementary material
Source: PubMed Central journal article supplement (PMC4179102)
Supplement: peds.2014-1179_peds.2014-1179SupplementaryData.pdf [file peds.2014-1179_peds.2014-1179SupplementaryData.pdf]

## Supplemental Information

**SUPPLEMENTAL TABLE 4** Items Comprising the Violence Measures

| DV                                    | Wave 2                                                                                                                                                                                      | Wave 3                                                                                                                                                                                                                 | Wave 4                                                                                                                                                                                                                                  |
|---------------------------------------|---------------------------------------------------------------------------------------------------------------------------------------------------------------------------------------------|------------------------------------------------------------------------------------------------------------------------------------------------------------------------------------------------------------------------|-----------------------------------------------------------------------------------------------------------------------------------------------------------------------------------------------------------------------------------------|
| Physical                              | Did [your romantic partner] push or shove you? Did [your romantic partner] throw something at you that could hurt you? Did [your romantic partner] threaten you with violence? <sup>a</sup> | How often has [partner] threatened you with violence, pushed or shoved you, or thrown something at you that could hurt? How often has [partner] slapped, hit, or kicked you?                                           | How often (has/did) [partner] (threatened/threaten) you with violence, (pushed/push) or (shoved/shove) you, or (thrown/throw) something at you that could hurt? How often (has/did) [partner] (slapped/slap), hit or (kicked/kick) you? |
| Sexual                                | NA                                                                                                                                                                                          | How often has [partner] insisted on or made you have sexual relations with [him/her] when you didn't want to?                                                                                                          | How often (has/did) [partner] (insisted/insist) on or (made/make) you have sexual relations with (him/her) when you didn't want to?                                                                                                     |
| Child maltreatment                    |                                                                                                                                                                                             |                                                                                                                                                                                                                        |                                                                                                                                                                                                                                         |
| Acts of omission                      |                                                                                                                                                                                             |                                                                                                                                                                                                                        |                                                                                                                                                                                                                                         |
| Failure to supervise                  |                                                                                                                                                                                             | By the time you started sixth grade, how often had your parents or other adult caregivers left you home alone when an adult should have been with you?                                                                 |                                                                                                                                                                                                                                         |
| Failure to provide (physical neglect) |                                                                                                                                                                                             | [By the time you started sixth grade] how often had your parents or other adult caregivers not taken care of your basic needs, such as keeping you clean or providing food or clothing?                                |                                                                                                                                                                                                                                         |
| Acts of commission                    |                                                                                                                                                                                             |                                                                                                                                                                                                                        |                                                                                                                                                                                                                                         |
| Physical abuse                        |                                                                                                                                                                                             | [By the time you started sixth grade] how often had your parents or other adult caregivers slapped, hit, or kicked you?                                                                                                |                                                                                                                                                                                                                                         |
| Sexual abuse                          |                                                                                                                                                                                             | [By the time you started sixth grade] how often had one of your parents or other adult caregivers touched you in a sexual way, forced you to touch him or her in a sexual way, or forced you to have sexual relations? |                                                                                                                                                                                                                                         |

NA, not applicable.

<sup>a</sup> Threatening violence measure included as a measure of physical violence based on grouping of physical violence questions in waves 3 and 4.
